# Supplementary material
Source: PubMed Central journal article supplement (PMC4651165)
Supplement: gf526sup_10-1055-s-0032-1315340.pdf [file gf526sup_10-1055-s-0032-1315340.pdf]

# Biomarker beim Mammakarzinom – ein Update

## Biomarkers in Breast Cancer – An Update

### Autoren

M. Schmidt<sup>1</sup>, P. A. Fasching<sup>2</sup>, M. W. Beckmann<sup>2</sup>, H. Kölbl<sup>1</sup>

### Institute

<sup>1</sup> Klinik für Geburtshilfe und Frauenkrankheiten, Universitätsmedizin Mainz, Mainz

<sup>2</sup> Frauenklinik, Universitätsklinikum Erlangen, Erlangen

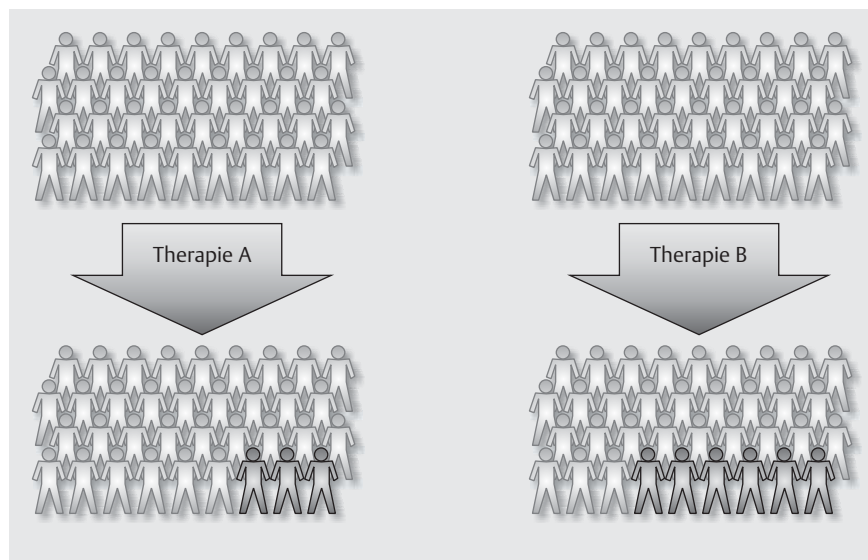

**Abb. 1** Üblicher empirischer Vergleich von 2 gleichen Patientinnengruppen. Bei Therapie A scheinen weniger Rückfälle (schwarz markierte Personen) aufgetreten zu sein. Schlussfolgerung aus einer solchen Vergleichsstudie ist, dass Therapie A besser sein muss.

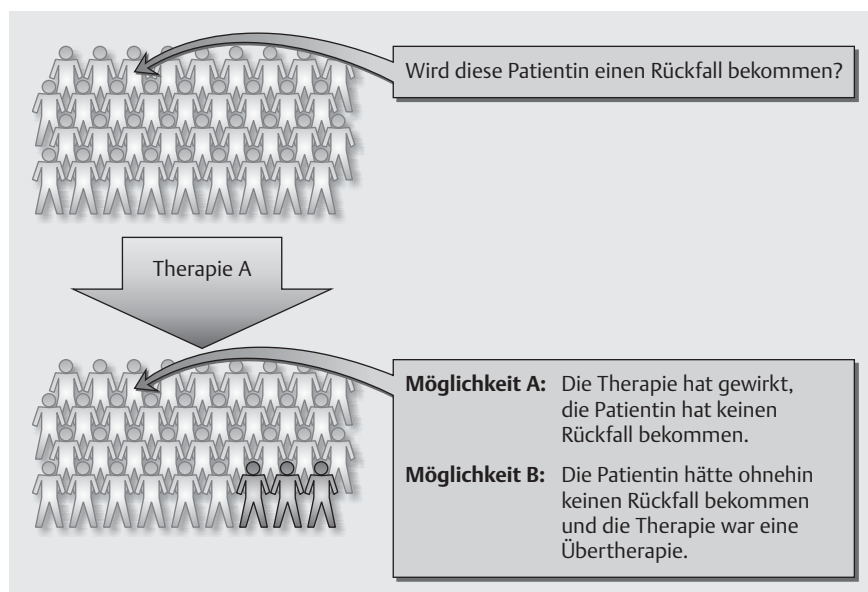

**Abb. 2** Erklärungsansätze für die individuelle Patientin, die mit Therapie A (● Abb. 1) behandelt wurden.

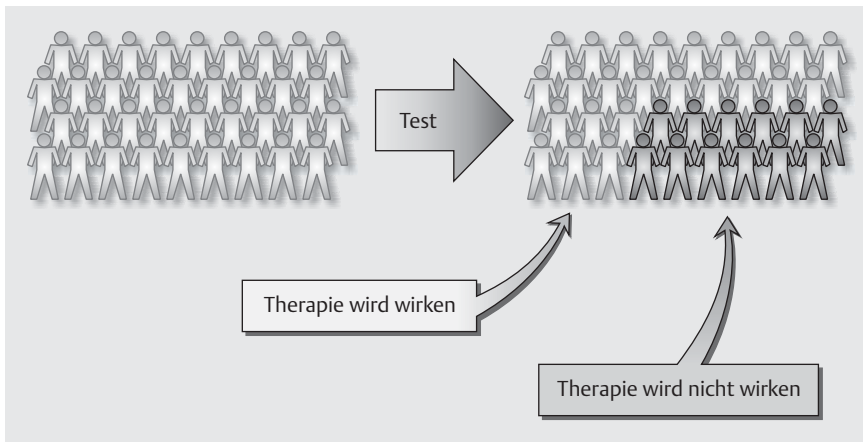

**Abb. 3** Forderung für die Therapieplanung der Zukunft. Prädiktion des Therapieansprechens durch einen Biomarkertest.

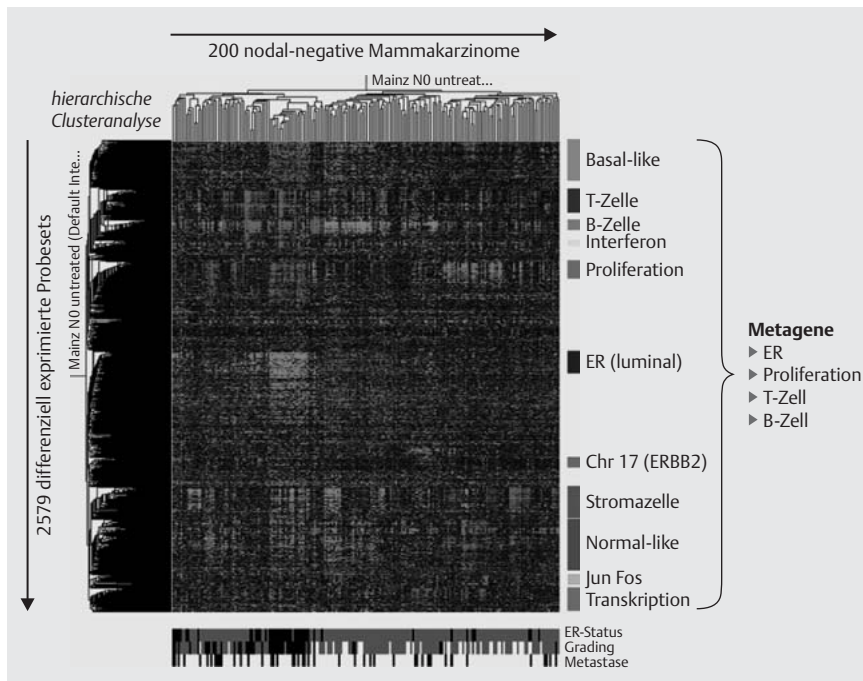

**Abb. 4** Hierarchische Clusteranalyse einer systematischen Genexpressionsbestimmung mittels Microarray bei nodal-negativen und adjuvant unbehandelten Patientinnen.

**Tab. 1** Therapieempfehlungen nach aktuellem St.-Gallen-Konsensus [8]. (ET: endokrine Therapie; CT: Chemotherapie; Anti-HER2: Therapie gegen HER2).

| Subtyp                     | Therapie                        |
|----------------------------|---------------------------------|
| Luminal A                  | ET                              |
| Luminal B (HER2 negativ)   | ET ± CT („nach Risikoabwägung“) |
| Luminal B (HER2 positiv)   | CT + Anti-HER2 + ET             |
| HER2 positiv (non-luminal) | CT + Anti-HER2                  |
| Triple-negativ             | CT                              |
